# Supplementary material for: The Impact of Moyamoya Disease and RNF213 Mutations on the Spectrum of Plasma Protein and MicroRNA
Source: PubMed Central journal article supplement (PMC6832561; doi:10.3390/jcm8101648), 2019-10-10

Table S1. Demographic and clinical phenotype data for patients included in the study.

|                                | Sample ID | Age | Sex | Family history | RNF213 Mutation | Measurement |     |       | Clinical manifestations                                                                                                                                                   | Brain images                                                                   | Findings from Angiography or MRA                                                                                                                                                                                                                             |
|--------------------------------|-----------|-----|-----|----------------|-----------------|-------------|-----|-------|---------------------------------------------------------------------------------------------------------------------------------------------------------------------------|--------------------------------------------------------------------------------|--------------------------------------------------------------------------------------------------------------------------------------------------------------------------------------------------------------------------------------------------------------|
|                                |           |     |     |                |                 | NGS         | PEA | iTRAQ |                                                                                                                                                                           |                                                                                |                                                                                                                                                                                                                                                              |
| Patient with a RNF213 mutation | SN17      | 17  | F   | -              | p.A1622V        | X           | X   | X     | Acute onset weakness of the right side of limbs, sensory deficits on the right side of body. Bilateral EDAS has been performed with improvement of neurological deficits. | No focal lesion on brain parenchyma.                                           | Nearly total occlusion of bilateral proximal MCAs and ACAs with puff of smoke like collaterals.                                                                                                                                                              |
|                                | SN34      | 7   | M   | +              | p.V3933M        | X           | X   | X     | Insidious onset right hand weakness followed by transient numbness on the right upper limb. Bilateral EDAS with duroplexy have been performed.                            | Late subacute infarctions at the left fronto-parietal lobe and basal ganglion. | Stenosis of the left ICA and proximal MCA (M1 segment). Occlusion of the left ACA (A1 segment) with collateral circulation of multiple lenticulostriate and thalamoperforating arteries. Collaterals through the left olfactory bulb are also noted.         |
|                                | SN03      | 20  | F   | +              | p.R4131C        | X           | X   | X     | Acute onset right hemiparesis with gait difficulties. Recurrent headache occurred before the attack. Bilateral EDAS have been performed.                                  | A few old lacunar infarcts on the right basal ganglia.                         | Severe narrowing at bilateral distal ICA and proximal MCA and ACA. Prominent collaterals at lenticulostriate arteries and leptomeningeal collaterals (from PCA to MCA and ACA). Prominent retrograde flow from bilateral olfactory bulbs to ACA territories. |
|                                | SN09      | 11  | M   | -              | p.R4810K        | X           | X   | X     | Acute onset left leg weakness. A few episodes of left hand numbness occurred with total recover of the sensory deficits. Bilateral EDAS has been performed.               | No focal lesion on brain parenchyma.                                           | Nearly total occlusion of bilateral supraclinoid ICAs, MCAs and ACAs with puff of smoke like collaterals. Prominent bilateral anterior choroid arteries and P-coms, compatible with moyamoya phenomenon.                                                     |
|                                | SN25      | 14  | F   | -              | p.R4810K        | X           | X   | X     | Acute onset right hemiparesis with totally recover. Post bilateral STA-MCA anastomosis and the left EDAS have been performed.                                             | No focal lesion on brain parenchyma.                                           | Severe narrowing of bilateral ICAs, MCAs and ACAs with prominent collaterals at lenticulostriate regions and                                                                                                                                                 |

|                                 |        |    |   |   |          |   |   |   |  |                                                                                                                                                                                                                                                                              |                                                                                                     |                                                                                                                                                                                                     |
|---------------------------------|--------|----|---|---|----------|---|---|---|--|------------------------------------------------------------------------------------------------------------------------------------------------------------------------------------------------------------------------------------------------------------------------------|-----------------------------------------------------------------------------------------------------|-----------------------------------------------------------------------------------------------------------------------------------------------------------------------------------------------------|
|                                 |        |    |   |   |          |   |   |   |  |                                                                                                                                                                                                                                                                              | collaterals from PCAs to ACA and MCA territories.                                                   |                                                                                                                                                                                                     |
|                                 | SN10   | 7  | M | + | p.R4810K | X | X |   |  | Insidious onset attention deficit, acute onset unsteady gaits and involuntary movement on the left side limbs followed by weakness. The left EDAS on the left side and the indirect EC-IC bypass surgery with pericranium pedical flap on the right one have been performed. | A few old infarctions on the right medial parietal lobe, fronto-parietal and left temporal regions. | Occlusions on bilateral ICA, proximal MCA and ACA. Engorged enlargement of bilateral middle meningeal arteries and superficial temporal arteries.                                                   |
|                                 | SN10-4 | 18 | F | + | p.R4810K |   |   | X |  | Acute onset left hemiparesis. No operation for the cerebral arteries.                                                                                                                                                                                                        | No focal lesion on brain parenchyma.                                                                | Mildly thin flow signals within proximal bilateral MCAs and ACAs.                                                                                                                                   |
| Patient without RNF213 mutation | SN11   | 12 | F | - | -        | X |   | X |  | Acute onset intermittent dizziness, headache, convulsion of left hand and forearm. Intermittent numbness also found in the left hand. Bilateral EDAS has been performed.                                                                                                     | No lesion in the brain parenchyma.                                                                  | Total occlusion of bilateral supraclinoid ICAs, ACAs, and MCAs; increased lenticulostriate collaterals. The ACA and MCA territories are supplied by collaterals from ophthalmic arteries, PCA, MMA. |
|                                 | SN15   | 14 | M | - | -        | X | X | X |  | Acute onset transient dyspraxic aphasia with totally recover. Bilateral EDAS has been performed without significant improvement of collateral circulation. Medical history of hypertension and renal artery stenosis.                                                        | No abnormal focal signal change in the brain parenchyma.                                            | Nearly total occlusion of bilateral MCAs (M1 segments) with increased collaterals at basal ganglia regions.                                                                                         |
|                                 | SN19   | 20 | F | - | -        | X | X | X |  | Acute onset migraine headache on bilateral temporal region. Dizziness with unsteadiness also found. She developed acute onset numbness on the left hand. Bilateral EDAS has been performed.                                                                                  | No abnormal focal signal change in the brain parenchyma.                                            | Moderate to severe stenosis at bilateral ICA bifurcation and bilateral proximal MCAs and ACAs with well-developed collaterals from bilateral lenticulostriate arteries and PCAs.                    |
|                                 | SN24   | 16 | M | - | -        | X | X | X |  | Acute onset headache without neurological deficits. Bilateral EDAS has been performed.                                                                                                                                                                                       | Small areas of impaired perfusion at bilateral                                                      | Nearly total occlusion of bilateral supraclinoid ICAs and proximal MCAs and ACAs with puff of smoke like collaterals. Prominent                                                                     |

|                 |      |    |   |   |          |   |   |              |                                                                                                                                                                   |                                                               |                                                                                                                             |
|-----------------|------|----|---|---|----------|---|---|--------------|-------------------------------------------------------------------------------------------------------------------------------------------------------------------|---------------------------------------------------------------|-----------------------------------------------------------------------------------------------------------------------------|
|                 |      |    |   |   |          |   |   |              |                                                                                                                                                                   | periventricular white matter.                                 | bilateral anterior choroid arteries, compatible with moyamoya phenomenon.                                                   |
|                 | SN26 | 9  | F | - | -        | X | X | X            | Epilepsy with right side weakness after attack. Acute onset left side weakness and facial twitching followed by total recover. Bilateral EDAS has been performed. | A few focal old infarctions at the left frontal white matter. | Total occlusion of bilateral ACAs and bilateral MCAs. Formation of multiple tiny collateral vessels is found at both sides. |
| Normal Controls | 11-1 | 36 | M | - | -        | X | X |              | Unremarkable                                                                                                                                                      | N.A.                                                          | N.A.                                                                                                                        |
|                 | 11-2 | 35 | F | - | -        | X | X |              | Unremarkable                                                                                                                                                      | N.A.                                                          | N.A.                                                                                                                        |
|                 | 11-3 | 17 | M | - | -        | X | X |              | Unremarkable                                                                                                                                                      | N.A.                                                          | N.A.                                                                                                                        |
|                 | 15-1 | 51 | M | - | -        | X | X |              | Unremarkable                                                                                                                                                      | N.A.                                                          | N.A.                                                                                                                        |
|                 | 15-2 | 48 | F | - | -        | X | X |              | Unremarkable                                                                                                                                                      | N.A.                                                          | N.A.                                                                                                                        |
|                 | 15-3 | 15 | F | - | -        | X | X |              | Unremarkable                                                                                                                                                      | N.A.                                                          | N.A.                                                                                                                        |
|                 | 10-1 | 47 | M | - | -        | X | X |              | Unremarkable                                                                                                                                                      | N.A.                                                          | N.A.                                                                                                                        |
|                 | 10-2 | 44 | F | + | p.R4810K | X | X |              | Unremarkable                                                                                                                                                      | No lesion in brain                                            | Normal                                                                                                                      |
|                 | 10-3 | 14 | F | - | -        | X | X | X            | Unremarkable                                                                                                                                                      | N.A.                                                          | N.A.                                                                                                                        |
|                 | 18-3 | 19 | F | - | -        | X | X | X            | Unremarkable                                                                                                                                                      | N.A.                                                          | N.A.                                                                                                                        |
| 31-3            | 15   | M  | - | - | X        | X | X | Unremarkable | N.A.                                                                                                                                                              | N.A.                                                          |                                                                                                                             |
| 36-3            | 15   | M  | - | - | X        | X | X | Unremarkable | N.A.                                                                                                                                                              | N.A.                                                          |                                                                                                                             |

ACA = anterior cerebral artery, EDAS = encephaloduroangiosynotosis, F = female, ICA = internal carotid artery, M = male, MCA = middle cerebral artery, MMA = middle meningeal artery, MRA = magnetic resonance image of angiography, PCA = posterior cerebral artery, STA = superficial temporal artery.

Table S2. List of inflammatory response related proteins measured by Olink assay.

| Olink assay # | Name used in Olink panel | Official Gene symbol | Description                                                   |
|---------------|--------------------------|----------------------|---------------------------------------------------------------|
| 194           | ADA                      | ADA                  | Adenosine Deaminase                                           |
| 160           | ARTN                     | ARTN                 | Artemin                                                       |
| 118           | AXIN1                    | AXIN1                | Axin-1                                                        |
| 103           | BDNF                     | BDNF                 | Brain-derived neurotrophic factor                             |
| 184           | CASP-8                   | CASP8                | Caspase 8                                                     |
| 137           | CCL11                    | CCL11                | Eotaxin-1                                                     |
| 136           | MCP-4                    | CCL13                | Monocyte chemotactic protein 4                                |
| 145           | CCL19                    | CCL19                | C-C motif chemokine 19                                        |
| 115           | MCP-1                    | CCL2                 | Monocyte chemotactic protein 1                                |
| 190           | CCL20                    | CCL20                | C-C motif chemokine 20                                        |
| 164           | CCL23                    | CCL23                | C-C motif chemokine 23                                        |
| 185           | CCL25                    | CCL25                | C-C motif chemokine 25                                        |
| 173           | CCL28                    | CCL28                | C-C motif chemokine 28                                        |
| 166           | MIP-1 alpha              | CCL3                 | Macrophage inflammatory protein 1-alpha                       |
| 130           | CCL4                     | CCL4                 | C-C motif chemokine 4                                         |
| 105           | MCP-3                    | CCL7                 | Monocyte chemotactic protein 3                                |
| 183           | MCP-2                    | CCL8                 | Monocyte chemotactic protein 2                                |
| 108           | CD244                    | CD244                | Natural killer cell receptor 2B4                              |
| 152           | PD-L1                    | CD274                | Programmed cell death 1 ligand 1                              |
| 176           | CD40                     | CD40                 | CD40L receptor                                                |
| 165           | CD5                      | CD5                  | T-cell surface glycoprotein CD5                               |
| 131           | CD6                      | CD6                  | T cell surface glycoprotein CD6 isoform                       |
| 107           | CDCP1                    | CDCP1                | CUB domain-containing protein 1                               |
| 196           | CSF-1                    | CSF1                 | Macrophage colony-stimulating factor 1                        |
| 123           | CST5                     | CST5                 | Cystatin D                                                    |
| 186           | CX3CL1                   | CX3CL1               | Fractalkine                                                   |
| 128           | CXCL1                    | CXCL1                | C-X-C motif chemokine 1                                       |
| 169           | CXCL10                   | CXCL10               | C-X-C motif chemokine 10                                      |
| 117           | CXCL11                   | CXCL11               | C-X-C motif chemokine 11                                      |
| 154           | CXCL5                    | CXCL5                | C-X-C motif chemokine 5                                       |
| 168           | CXCL6                    | CXCL6                | C-X-C motif chemokine 6                                       |
| 101           | IL-8                     | CXCL8                | Interleukin-8                                                 |
| 122           | CXCL9                    | CXCL9                | C-X-C motif chemokine 9                                       |
| 174           | DNER                     | DNER                 | Delta and Notch-like epidermal growth factor-related receptor |
| 170           | 4E-BP1                   | EIF4EBP1             | Eukaryotic translation initiation factor 4E-binding protein 1 |
| 179           | FGF-19                   | FGF19                | Fibroblast growth factor 19                                   |
| 144           | FGF-21                   | FGF21                | Fibroblast growth factor 21                                   |
| 139           | FGF-23                   | FGF23                | Fibroblast growth factor 23                                   |
| 141           | FGF-5                    | FGF5                 | Fibroblast growth factor 5                                    |
| 167           | Flt3L                    | FLT3LG               | Fms-related tyrosine kinase 3 ligand                          |
| 106           | GDNF                     | GDNF                 | Glial cell line-derived neurotrophic factor                   |
| 156           | HGF                      | HGF                  | Hepatocyte growth factor                                      |
| 178           | IFN-gamma                | IFNG                 | Interferon gamma                                              |
| 162           | IL-10                    | IL10                 | Interleukin-10                                                |
| 140           | IL-10RA                  | IL10RA               | Interleukin-10 receptor subunit alpha                         |
| 149           | IL-10RB                  | IL10RB               | Interleukin-10 receptor subunit beta                          |
| 157           | IL-12B                   | IL12B                | Interleukin-12 subunit beta                                   |
| 159           | IL-13                    | IL13                 | Interleukin-13                                                |
| 148           | IL-15RA                  | IL15RA               | Interleukin-15 receptor subunit alpha                         |
| 116           | IL-17A                   | IL17A                | Interleukin-17A                                               |
| 114           | IL-17C                   | IL17C                | Interleukin-17C                                               |
| 133           | IL-18                    | IL18                 | Interleukin-18                                                |

|     |                |           |                                                              |
|-----|----------------|-----------|--------------------------------------------------------------|
| 151 | IL-18R1        | IL18R1    | Interleukin-18 receptor 1                                    |
| 125 | IL-1 alpha     | IL1A      | Interleukin-1 alpha                                          |
| 127 | IL-2           | IL2       | Interleukin-2                                                |
| 171 | IL-20          | IL20      | Interleukin-20                                               |
| 121 | IL-20RA        | IL20RA    | Interleukin-20 receptor subunit alpha                        |
| 150 | IL-22 RA1      | IL22RA1   | Interleukin-22 receptor subunit alpha-1                      |
| 158 | IL-24          | IL24      | Interleukin-24                                               |
| 124 | IL-2RB         | IL2RB     | Interleukin-2 receptor subunit beta                          |
| 177 | IL-33          | IL33      | Interleukin-33                                               |
| 180 | IL-4           | IL4       | Interleukin-4                                                |
| 193 | IL-5           | IL5       | Interleukin-5                                                |
| 113 | IL-6           | IL6       | Interleukin-6                                                |
| 109 | IL-7           | IL7       | Interleukin-7                                                |
| 132 | SCF            | KITLG     | Stem cell factor                                             |
| 181 | LIF            | LIF       | Leukemia inhibitory factor                                   |
| 143 | LIF-R          | LIFR      | Leukemia inhibitory factor receptor                          |
| 195 | TNFB           | LTA       | TNF-beta, Lymphotoxin Alpha                                  |
| 142 | MMP-1          | MMP1      | Matrix metalloproteinase-1                                   |
| 161 | MMP-10         | MMP10     | Matrix metalloproteinase-10                                  |
| 153 | Beta-NGF       | NGF       | Beta-nerve growth factor                                     |
| 182 | NRTN           | NRTN      | Neurturin                                                    |
| 188 | NT-3           | NTF3      | Neurotrophin-3                                               |
| 126 | OSM            | OSM       | Oncostatin-M                                                 |
| 112 | uPA            | PLAU      | Urokinase-type plasminogen activator                         |
| 175 | EN-RAGE        | S100A12   | Protein S100-A12                                             |
| 172 | SIRT2          | SIRT2     | SIR2-like protein 2                                          |
| 134 | SLAMF1         | SLAMF1    | Signaling lymphocytic activation molecule                    |
| 192 | STAMPB         | STAMPB    | STAM-binding protein                                         |
| 191 | ST1A1          | SULT1A1   | Sulfotransferase 1A1                                         |
| 135 | TGF-alpha      | TGFA      | Transforming growth factor alpha                             |
| 111 | LAP TGF-beta-1 | TGFB1     | Latency-associated peptide transforming growth factor beta 1 |
| 163 | TNF            | TNF       | Tumor necrosis factor                                        |
| 110 | OPG            | TNFRSF11B | Osteoprotegerin                                              |
| 187 | TNFRSF9        | TNFRSF9   | Tumor necrosis factor receptor superfamily member 9          |
| 120 | TRAIL          | TNFSF10   | TNF-related apoptosis-inducing ligand                        |
| 155 | TRANCE         | TNFSF11   | TNF-related activation-induced cytokine                      |
| 189 | TWEAK          | TNFSF12   | Tumor necrosis factor (Ligand) superfamily, member 12        |
| 138 | TNFSF14        | TNFSF14   | Tumor necrosis factor ligand superfamily member 14           |
| 129 | TSLP           | TSLP      | Thymic stromal lymphopoietin                                 |
| 102 | VEGF-A         | VEGFA     | Vascular endothelial growth factor A                         |

Table S3. List of the top 10 most abundant miRNA (miRNAs are listed in order of abundance) identified in the different sample types and conditions.

| Whole plasma* |             | EV*         |             | EV-depleted plasma* |             |
|---------------|-------------|-------------|-------------|---------------------|-------------|
| Moyamoya      | Control     | Moyamoya    | Control     | Moyamoya            | Control     |
| miR-451a-5p   | miR-451a-5p | miR-451a-5p | miR-451a-5p | miR-451a-5p         | miR-451a-5p |
| miR-92a-3p    | miR-92a-3p  | miR-92a-3p  | miR-92a-3p  | miR-92a-3p          | miR-92a-3p  |
| miR-486-5p    | miR-486-5p  | miR-126-3p  | miR-486-5p  | miR-486-5p          | miR-486-5p  |
| miR-16-5p     | miR-16-5p   | miR-486-5p  | miR-126-3p  | miR-16-5p           | miR-16-5p   |
| miR-21-5p     | miR-21-5p   | miR-16-5p   | miR-21-5p   | miR-21-5p           | miR-21-5p   |
| miR-23a-3p    | miR-25-3p   | miR-21-5p   | miR-16-5p   | miR-423-5p          | miR-423-5p  |
| miR-25-3p     | miR-23a-3p  | miR-23a-3p  | miR-23a-3p  | miR-320a-3p         | miR-25-3p   |
| miR-423-5p    | miR-423-5p  | miR-26a-5p  | miR-26a-5p  | miR-25-3p           | miR-320a-3p |
| miR-320a-3p   | miR-22-3p   | miR-223-3p  | let-7a-5p   | miR-23a-3p          | miR-19b-3p  |
| miR-22-3p     | miR-320a-3p | miR-126-5p  | miR-126-5p  | miR-22-3p           | miR-22-3p   |

\*: The miRNA observed in all three different sample types are listed in boldface characters.

Table S4. List of miRNA showing concentration difference between inside and outside of EV.

| miRNA ID                           | Sequence                | Concentration difference |                 |                | p-Value    |                 |                |          |
|------------------------------------|-------------------------|--------------------------|-----------------|----------------|------------|-----------------|----------------|----------|
|                                    |                         | EV-depleted plasma/EV    |                 |                | All sample | Moyamoya sample | Control sample |          |
|                                    |                         | All sample               | Moyamoya sample | Control sample |            |                 |                |          |
| Higher concentration inside of EV  | hsa-let-7a-1-5p         | TGAGGTAGTAGGTTGTATAGTT   | -1.06           | -1.50          | -0.70      | 8.15E-04        | 1.18E-03       | 1.09E-01 |
|                                    | hsa-let-7c-5p           | TGAGGTAGTAGGTTGTATGGTT   | -1.83           | -2.49          | -1.32      | 2.37E-04        | 6.19E-03       | 1.35E-02 |
|                                    | hsa-let-7e-5p           | TGAGGTAGGAGGTTGTATAGTT   | -1.71           | -1.76          | -1.68      | 9.69E-08        | 5.11E-04       | 8.82E-05 |
|                                    | hsa-let-7f-1-5p         | TGAGGTAGTAGATTGTATAGTT   | -1.00           | -1.57          | -0.55      | 2.21E-03        | 7.66E-04       | 2.28E-01 |
|                                    | hsa-let-7f-2-5p         | TGAGGTAGTAGATTGTATAGTT   | -1.18           | -1.74          | -0.74      | 5.96E-04        | 1.38E-03       | 1.23E-01 |
|                                    | hsa-miR-103b-1-5p       | TCATAGCCCTGTACAATGCTGCT  | -0.72           | -0.60          | -0.82      | 2.04E-02        | 1.99E-01       | 6.66E-02 |
|                                    | hsa-miR-125a-5p         | TCCCTGAGACCCTTTAACCTGTGA | -1.12           | -1.18          | -1.07      | 3.08E-04        | 2.52E-02       | 6.48E-03 |
|                                    | hsa-miR-126-3p          | TCGTACCCTGAGTAATAATGCG   | -2.96           | -3.20          | -2.76      | 1.31E-11        | 8.17E-07       | 7.01E-06 |
|                                    | hsa-miR-126-5p          | CATTATTACTTTTGGTACGCG    | -1.28           | -1.42          | -1.17      | 4.90E-05        | 1.62E-03       | 1.07E-02 |
|                                    | hsa-miR-132-5p          | ACCGTGGCTTTCGATTGTTACT   | -0.83           | -0.80          | -0.84      | 1.21E-02        | 1.32E-01       | 6.24E-02 |
|                                    | hsa-miR-139-5p          | TCTACAGTGACGCTGTCTCCAGT  | -1.83           | -1.54          | -2.05      | 1.70E-07        | 4.55E-03       | 8.62E-06 |
|                                    | hsa-miR-142-3p          | TGTAGTGTTCCTACTTTATGGA   | -2.13           | -2.36          | -1.94      | 1.21E-08        | 1.03E-04       | 7.88E-05 |
|                                    | hsa-miR-144-5p          | GGATATCATATACTGTAAG      | -1.07           | -1.51          | -0.73      | 4.73E-04        | 2.63E-03       | 5.38E-02 |
|                                    | hsa-miR-146b-5p         | TGAGAACTGAATTCATAGGCT    | -0.97           | -1.79          | -0.32      | 1.66E-02        | 2.72E-03       | 5.62E-01 |
|                                    | hsa-miR-150-5p          | TCTCCAACCCCTGTACCAGTG    | -1.77           | -1.87          | -1.68      | 1.90E-05        | 4.49E-03       | 2.61E-03 |
|                                    | hsa-miR-155-5p          | TTAATGCTAATCGTGATAGGGGT  | -1.31           | -1.04          | -1.51      | 1.80E-03        | 1.38E-01       | 4.62E-03 |
|                                    | hsa-miR-181c-5p         | AACATTCAACCTGTCGGTGAGT   | -0.61           | -0.81          | -0.46      | 4.24E-02        | 7.54E-02       | 2.76E-01 |
|                                    | hsa-miR-190a-5p         | TGATATGTTTGATATATTAGGT   | -1.12           | -1.51          | -0.80      | 2.43E-04        | 6.36E-03       | 2.02E-02 |
|                                    | hsa-miR-195-5p          | TAGCAGCACAGAAATATTGGC    | -1.06           | -1.07          | -1.04      | 2.31E-03        | 5.95E-02       | 2.01E-02 |
|                                    | hsa-miR-200b-3p         | TAATACTGCCTGGTAATGATGA   | -0.72           | -0.52          | -0.87      | 1.11E-02        | 2.48E-01       | 2.26E-02 |
|                                    | hsa-miR-203a-3p         | GTGAAATGTTTAGGACCACTAG   | -1.44           | -1.24          | -1.59      | 9.45E-05        | 1.05E-02       | 4.48E-03 |
|                                    | hsa-miR-23b-3p          | ATCAGATTGCCAGGGATTACC    | -1.87           | -1.93          | -1.82      | 1.71E-07        | 1.17E-03       | 8.84E-05 |
|                                    | hsa-miR-26a-1-5p        | TTCAAGTAATCCAGGATAGGCT   | -2.05           | -2.54          | -1.66      | 2.35E-06        | 1.31E-05       | 8.58E-03 |
|                                    | hsa-miR-26b-5p          | TTCAAGTAATTCAGGATAGGT    | -1.58           | -2.11          | -1.16      | 2.02E-05        | 9.80E-05       | 2.42E-02 |
|                                    | hsa-miR-28-5p           | AAGGAGCTCACAGTCTATTGAG   | -0.88           | -0.90          | -0.88      | 9.09E-03        | 5.13E-02       | 7.47E-02 |
|                                    | hsa-miR-3168-5p         | GAGTTCTACAGTCAGAC        | -0.87           | -0.85          | -0.89      | 6.52E-03        | 9.71E-02       | 3.90E-02 |
|                                    | hsa-miR-331-3p          | GCCCTGGGCCTATCCTAGAA     | -1.00           | -0.76          | -1.20      | 1.85E-03        | 1.76E-01       | 1.91E-03 |
|                                    | hsa-miR-338-3p          | TCCAGCATCAGTGATTTGTGTG   | -1.03           | -1.39          | -0.75      | 2.57E-03        | 1.12E-02       | 1.01E-01 |
|                                    | hsa-miR-340-3p          | TCCGTCTCAGTTACTTTATAGC   | -0.99           | -1.02          | -0.97      | 3.33E-03        | 5.55E-02       | 4.16E-02 |
|                                    | hsa-miR-370-3p          | GCCTGCTGGGGTGGAACCTGGT   | -0.61           | -0.22          | -0.94      | 7.33E-02        | 6.94E-01       | 3.47E-02 |
|                                    | hsa-miR-374a-5p         | TTATAATACAACCTGATAAGTG   | -1.52           | -2.01          | -1.12      | 9.74E-04        | 3.34E-03       | 7.60E-02 |
|                                    | hsa-miR-374b-5p         | ATATAATACAACCTGCTAAGTG   | -1.53           | -1.84          | -1.30      | 1.98E-05        | 6.59E-04       | 7.90E-03 |
|                                    | hsa-miR-378e-3p         | ACTGGACTTGAGTCAGGA       | -0.68           | -0.67          | -0.69      | 4.36E-02        | 2.37E-01       | 1.22E-01 |
| hsa-miR-411-5p                     | TAGTAGACCGTATAGCGTACG   | -0.85                    | -0.73           | -0.95          | 3.91E-02   | 2.36E-01        | 1.05E-01       |          |
| hsa-miR-449a-5p                    | TGGCAGTGATTGTTAGCTGGT   | -0.55                    | -1.06           | -0.14          | 6.46E-02   | 1.26E-02        | 7.54E-01       |          |
| hsa-miR-454-3p                     | TAGTGCAATATTGCTTATAGGGT | -1.15                    | -1.41           | -0.95          | 3.71E-04   | 2.30E-03        | 3.69E-02       |          |
| hsa-miR-615-3p                     | TCCGAGCCTGGGTCTCCCTCTT  | -0.90                    | -0.65           | -1.08          | 9.69E-03   | 1.69E-01        | 3.33E-02       |          |
| hsa-miR-6756-5p                    | AGGGTGGGGCTGGAGGTGGGGCT | -0.53                    | -0.17           | -0.81          | 5.96E-02   | 7.25E-01        | 1.86E-02       |          |
| Higher concentration outside of EV | hsa-let-7a-1-3p         | CTATACAATCTACTGTCTTTC    | 1.32            | 1.23           | 1.39       | 1.21E-05        | 6.84E-03       | 9.33E-04 |
|                                    | hsa-let-7b-3p           | CTATACAACCTACTGCCTTCCC   | 2.60            | 2.58           | 2.63       | 4.15E-15        | 8.31E-07       | 4.79E-09 |
|                                    | hsa-let-7b-5p           | TGAGGTAGTAGGTTGTGTGGTT   | 1.03            | 0.46           | 1.48       | 2.71E-04        | 1.58E-01       | 7.39E-04 |
|                                    | hsa-let-7d-3p           | CTATACGACCTGCTGCCTTCT    | 2.49            | 2.32           | 2.62       | 3.80E-13        | 1.36E-04       | 5.43E-11 |
|                                    | hsa-let-7d-5p           | AGAGGTAGTAGGTTGCATAGTT   | 0.67            | 0.09           | 1.13       | 1.26E-02        | 7.94E-01       | 3.74E-03 |
|                                    | hsa-let-7i-3p           | CTGCGCAAGCTACTGCCTTGCT   | 1.02            | 0.85           | 1.16       | 5.79E-04        | 7.65E-02       | 3.60E-03 |
|                                    | hsa-let-7i-5p           | TGAGGTAGTAGTTTGTGCTGTT   | 2.00            | 1.19           | 2.64       | 1.45E-07        | 1.19E-02       | 3.30E-06 |
|                                    | hsa-miR-100-5p          | AACCCGTAGATCCGAACCTGTG   | 2.06            | 1.96           | 2.13       | 1.02E-08        | 4.64E-04       | 1.04E-05 |
|                                    | hsa-miR-101-1-3p        | TACAGTACTGTGATAACTGAA    | 2.15            | 1.58           | 2.59       | 3.91E-09        | 1.18E-03       | 1.76E-06 |
|                                    | hsa-miR-101-1-5p        | CAGTTATCACAGTGCTGATGCT   | 0.62            | 0.56           | 0.67       | 1.67E-02        | 1.21E-01       | 8.21E-02 |
|                                    | hsa-miR-103a-1-3p       | AGCAGCATTGTACAGGGCTATGA  | 1.36            | 0.64           | 1.94       | 3.83E-05        | 1.65E-01       | 3.29E-05 |
|                                    | hsa-miR-106b-5p         | TAAAGTGTGACAGTGCAGAT     | 2.01            | 1.34           | 2.54       | 1.07E-07        | 1.16E-02       | 3.26E-06 |
|                                    | hsa-miR-10a-3p          | CAAATTCGTATCTAGGGGAATA   | 0.91            | 0.86           | 0.93       | 2.65E-04        | 2.45E-02       | 6.18E-03 |
|                                    | hsa-miR-10b-3p          | ACAGATTCGATTCTAGGGGAAT   | 1.28            | 1.00           | 1.49       | 1.21E-07        | 8.10E-03       | 8.30E-07 |
|                                    | hsa-miR-1180-3p         | TTCCGGCTCGCGTGGGTGTGT    | 1.43            | 1.29           | 1.53       | 1.53E-05        | 1.82E-02       | 3.36E-04 |
|                                    | hsa-miR-122-5p          | TGGAGTGTGACAATGGTGTGTTG  | 3.07            | 3.08           | 3.05       | 1.25E-10        | 1.85E-04       | 3.01E-08 |
|                                    | hsa-miR-1228-5p         | GTGGGCGGGGCGAGGTGTGTG    | 0.64            | 0.94           | 0.40       | 2.99E-02        | 4.51E-02       | 3.13E-01 |
|                                    | hsa-miR-1246-5p         | AATGGATTTTTGGAGCAGG      | 0.76            | 0.74           | 0.78       | 1.26E-02        | 1.66E-01       | 4.29E-02 |
|                                    | hsa-miR-1249-3p         | ACGCCCTTCCCCCCTTCTTCA    | 1.00            | 1.13           | 0.91       | 3.01E-05        | 3.22E-03       | 2.06E-03 |
|                                    | hsa-miR-125b-1-5p       | TCCTGAGACCCTAACTTGTGA    | 0.79            | 0.88           | 0.72       | 9.81E-03        | 1.24E-01       | 3.70E-02 |
|                                    | hsa-miR-128-1-3p        | TCACAGTGAACCGGTCTCTTT    | 1.18            | 1.11           | 1.23       | 2.27E-04        | 5.08E-02       | 1.19E-03 |
|                                    | hsa-miR-1301-3p         | TTGAGCTGCCTGGGAGTGACTTC  | 0.76            | 0.82           | 0.71       | 7.07E-03        | 7.28E-02       | 5.11E-02 |
|                                    | hsa-miR-1306-5p         | CCACCTCCCCTGCAAACGTCCA   | 1.85            | 2.23           | 1.54       | 1.85E-08        | 3.74E-05       | 4.58E-04 |
| hsa-miR-1307-3p                    | ACTCGGCTGGCGTCCGGTCTGTG | 0.89                     | 1.02            | 0.77           | 7.35E-04   | 2.79E-02        | 1.28E-02       |          |

|                   |                         |      |      |      |          |          |          |
|-------------------|-------------------------|------|------|------|----------|----------|----------|
| hsa-miR-1307-5p   | TCGACCGGACCTCGACCGGCT   | 1.60 | 1.43 | 1.73 | 8.59E-08 | 4.03E-04 | 1.09E-04 |
| hsa-miR-130a-3p   | CAGTGAATGTTAAAAGGGCAT   | 2.21 | 1.85 | 2.50 | 3.95E-13 | 2.17E-05 | 2.20E-08 |
| hsa-miR-130b-3p   | CAGTGAATGATGAAAGGGCAT   | 2.59 | 2.08 | 2.99 | 3.18E-13 | 1.45E-05 | 1.07E-08 |
| hsa-miR-140-3p    | TACCACAGGGTAGAACCCGG    | 2.52 | 2.24 | 2.73 | 1.42E-09 | 4.85E-04 | 1.45E-06 |
| hsa-miR-142-5p    | CATAAAGTAGAAAGCACTACT   | 0.61 | 0.11 | 1.02 | 5.32E-02 | 8.12E-01 | 2.44E-02 |
| hsa-miR-144-3p    | TACAGTATAGATGATGACT     | 1.89 | 1.59 | 2.13 | 2.15E-06 | 1.06E-02 | 8.56E-05 |
| hsa-miR-145-5p    | GTCCAGTTTTCCAGGAATCCCT  | 3.47 | 2.89 | 3.93 | 1.94E-12 | 6.11E-04 | 1.04E-11 |
| hsa-miR-146a-5p   | TGAGAACTGAATTCATGGGTT   | 1.37 | 0.81 | 1.82 | 1.27E-04 | 9.52E-02 | 5.21E-04 |
| hsa-miR-148a-3p   | TCAGTGCCTACAGAACTTTGT   | 2.67 | 2.13 | 3.09 | 2.03E-12 | 1.48E-04 | 6.50E-09 |
| hsa-miR-148b-3p   | TCAGTGCATCACAGAACTTTGT  | 2.02 | 1.34 | 2.56 | 3.64E-09 | 5.52E-03 | 1.73E-07 |
| hsa-miR-150-3p    | CTGGTACAGGCCTGGGGACAG   | 1.52 | 1.90 | 1.21 | 2.17E-07 | 2.44E-05 | 4.05E-03 |
| hsa-miR-152-3p    | TCAGTGCATGACAGAACTTGG   | 1.09 | 0.78 | 1.34 | 3.76E-04 | 7.84E-02 | 2.18E-03 |
| hsa-miR-15a-5p    | TAGCAGCACATAATGTTTGTG   | 2.92 | 2.46 | 3.29 | 1.22E-14 | 1.29E-05 | 9.05E-10 |
| hsa-miR-15b-3p    | CGAATCATTATTGCTGCTCTA   | 2.23 | 1.68 | 2.66 | 2.64E-09 | 4.00E-03 | 5.76E-08 |
| hsa-miR-15b-5p    | TAGCAGCACATCATGTTTACA   | 1.73 | 1.29 | 2.08 | 3.06E-06 | 1.61E-02 | 9.53E-05 |
| hsa-miR-16-1-5p   | TAGCAGCAGCTAAATATTGGCG  | 2.49 | 1.99 | 2.90 | 4.26E-10 | 3.30E-04 | 8.19E-07 |
| hsa-miR-16-2-3p   | CCAATATTACTGTGCTGCTTTA  | 2.91 | 2.62 | 3.14 | 1.17E-11 | 2.42E-05 | 3.69E-07 |
| hsa-miR-17-5p     | CAAAGTGCTTACAGTGCAGGTAG | 0.80 | 0.56 | 1.00 | 1.45E-02 | 1.69E-01 | 4.93E-02 |
| hsa-miR-185-5p    | TGGAGAGAAAAGGCAGTTCCTGA | 2.33 | 1.52 | 2.98 | 6.29E-09 | 6.37E-03 | 1.29E-07 |
| hsa-miR-18a-3p    | ACTGCCCTAAGTGCTCCTTCTGG | 0.81 | 0.91 | 0.72 | 1.98E-02 | 7.08E-02 | 1.50E-01 |
| hsa-miR-191-5p    | CAACGGAATCCAAAAGCAGCTG  | 0.65 | 0.29 | 0.95 | 3.56E-02 | 5.82E-01 | 1.31E-02 |
| hsa-miR-192-5p    | CTGACCTATGAATTGACAGCC   | 2.08 | 1.62 | 2.43 | 8.47E-08 | 7.97E-03 | 2.32E-06 |
| hsa-miR-193a-5p   | TGGGTCTTTGCGGGCAGATGA   | 2.14 | 2.10 | 2.18 | 6.38E-09 | 3.97E-04 | 1.21E-05 |
| hsa-miR-194-1-5p  | TGTAACAGCAACTCCATGTGGA  | 2.53 | 2.22 | 2.76 | 1.05E-10 | 1.14E-04 | 4.26E-07 |
| hsa-miR-197-3p    | TTACCACCTTCTCCACCAGC    | 1.36 | 1.42 | 1.31 | 1.62E-06 | 7.41E-03 | 2.08E-05 |
| hsa-miR-199a-1-3p | ACAGTAGTCTGCACATTGGTTA  | 0.92 | 0.56 | 1.20 | 4.83E-03 | 2.65E-01 | 6.29E-03 |
| hsa-miR-19a-3p    | TGTGCAAATCTATGCAAACTGA  | 2.64 | 2.15 | 3.03 | 1.12E-11 | 1.18E-05 | 2.07E-07 |
| hsa-miR-19b-1-3p  | TGTGCAAATCCATGCAAACTGA  | 2.90 | 2.20 | 3.45 | 9.36E-13 | 6.81E-06 | 2.34E-08 |
| hsa-miR-20a-5p    | TAAAGTGCTTATAGTGCAGGTAG | 1.26 | 0.91 | 1.53 | 1.52E-04 | 4.44E-02 | 1.81E-03 |
| hsa-miR-20b-5p    | CAAAGTGCTCATAGTGCAGGTAG | 1.18 | 0.97 | 1.34 | 1.28E-04 | 5.11E-03 | 5.96E-03 |
| hsa-miR-21-5p     | TAGCTTATCAGACTGATGTTGA  | 1.69 | 1.25 | 2.04 | 3.27E-07 | 8.03E-03 | 1.72E-05 |
| hsa-miR-210-3p    | CTGTGCGTGTGACAGCGGCTGA  | 3.14 | 2.26 | 3.84 | 7.07E-12 | 3.43E-04 | 2.54E-09 |
| hsa-miR-2110-5p   | TTGGGGAACGGCCGCTGAGTG   | 0.73 | 0.77 | 0.68 | 8.22E-04 | 2.31E-02 | 2.09E-02 |
| hsa-miR-214-3p    | ACAGCAGGCACAGACAGGCAGT  | 1.84 | 1.65 | 2.01 | 1.02E-06 | 5.90E-03 | 1.06E-04 |
| hsa-miR-215-5p    | ATGACCTATGAATTGACAGAC   | 1.26 | 1.23 | 1.28 | 2.43E-05 | 2.96E-03 | 3.67E-03 |
| hsa-miR-22-3p     | AAGCTGCCAGTTGAAGAACTGT  | 2.69 | 2.12 | 3.14 | 1.04E-12 | 1.22E-04 | 1.46E-09 |
| hsa-miR-22-5p     | AGTTCTTCAGTGGCAAGCTTTA  | 3.02 | 2.30 | 3.59 | 7.19E-14 | 9.00E-05 | 4.57E-11 |
| hsa-miR-221-3p    | AGTACATTGTCTGCTGGGTTTC  | 1.91 | 1.56 | 2.18 | 2.90E-09 | 1.50E-03 | 6.14E-07 |
| hsa-miR-222-3p    | AGTACATCTGGCTACTGGGT    | 1.07 | 0.76 | 1.32 | 7.52E-06 | 2.95E-02 | 8.93E-05 |
| hsa-miR-223-5p    | CGTGATTTGACAAGCTGAGTT   | 0.99 | 0.23 | 1.57 | 3.17E-03 | 6.13E-01 | 4.75E-04 |
| hsa-miR-23a-3p    | ATCACATTGCCAGGGATTCC    | 1.04 | 0.81 | 1.23 | 6.33E-04 | 9.46E-02 | 2.66E-03 |
| hsa-miR-23a-5p    | GGGGTTCCTGGGGATGGGATTT  | 0.60 | 0.30 | 0.84 | 2.24E-02 | 5.01E-01 | 1.18E-02 |
| hsa-miR-24-1-3p   | TGGCTCAGTTCAGCAGGAACAG  | 2.22 | 1.82 | 2.54 | 7.59E-11 | 2.94E-04 | 1.06E-07 |
| hsa-miR-25-3p     | CATTGCACTTGCTCGGCTCGA   | 2.75 | 2.07 | 3.28 | 9.12E-10 | 1.08E-03 | 3.45E-07 |
| hsa-miR-27a-3p    | TTCACAGTGGCTAAGTCCCG    | 1.16 | 0.87 | 1.41 | 7.84E-04 | 8.48E-02 | 3.84E-03 |
| hsa-miR-296-5p    | AGGGCCCCCTCAATCCTGT     | 0.93 | 0.93 | 0.92 | 1.13E-03 | 2.29E-02 | 2.19E-02 |
| hsa-miR-29a-3p    | TAGCACCATCTGAAATCGGTTA  | 1.40 | 0.87 | 1.81 | 8.71E-06 | 5.21E-02 | 4.47E-05 |
| hsa-miR-29c-3p    | TAGCACCATTTGAAATCGGTTA  | 2.27 | 1.71 | 2.71 | 3.90E-10 | 2.24E-03 | 1.30E-08 |
| hsa-miR-30d-5p    | TGTAACATCCCCGACTGGAAG   | 1.73 | 1.37 | 2.01 | 3.42E-07 | 1.28E-02 | 5.25E-06 |
| hsa-miR-30e-5p    | TGTAACATCCTTGACTGGAAG   | 1.67 | 1.15 | 2.08 | 5.33E-07 | 2.23E-02 | 3.58E-06 |
| hsa-miR-32-5p     | TATTGCACATTACTAAGTTGCA  | 2.19 | 2.13 | 2.23 | 4.86E-08 | 9.31E-05 | 1.87E-04 |
| hsa-miR-3200-3p   | CACCTTGGCTACTCAGGCTG    | 2.04 | 1.86 | 2.18 | 3.56E-10 | 3.55E-05 | 3.96E-06 |
| hsa-miR-320a-3p   | AAAAGCTGGGTTGAGAGGGCGA  | 2.94 | 2.54 | 3.24 | 2.13E-14 | 5.13E-06 | 7.66E-10 |
| hsa-miR-320b-1-3p | AAAAGCTGGGTTGAGAGGGCAA  | 1.98 | 1.67 | 2.23 | 2.09E-10 | 2.04E-04 | 9.31E-07 |
| hsa-miR-324-3p    | ACTGCCCCAGGTGCTGCTGG    | 1.04 | 1.34 | 0.79 | 6.78E-05 | 1.86E-03 | 1.73E-02 |
| hsa-miR-328-3p    | CTGGCCCTCTGCCCCCTCCGT   | 1.65 | 1.66 | 1.65 | 1.18E-06 | 4.34E-03 | 9.57E-05 |
| hsa-miR-331-5p    | CTAGGTATGGTCCCAGGGATCC  | 2.34 | 2.11 | 2.52 | 5.68E-13 | 4.77E-05 | 2.68E-09 |
| hsa-miR-335-5p    | TCAAGAGCAATAACGAAAAATGT | 1.96 | 1.58 | 2.26 | 5.98E-08 | 8.09E-03 | 5.81E-07 |
| hsa-miR-339-3p    | TGAGCGCCTCGACGACAGAGCCG | 1.89 | 1.31 | 2.34 | 5.61E-07 | 3.00E-02 | 1.62E-06 |
| hsa-miR-339-5p    | TCCCTGCTCCAGGAGCTCACG   | 0.66 | 0.56 | 0.74 | 1.54E-02 | 2.71E-01 | 1.42E-02 |
| hsa-miR-345-5p    | GCTGACTCCTAGTCCAGGGCTC  | 2.30 | 1.70 | 2.77 | 7.50E-10 | 2.15E-03 | 2.56E-07 |
| hsa-miR-361-5p    | TTATCAGAATCTCCAGGGGTAC  | 1.19 | 1.40 | 1.04 | 5.62E-04 | 2.00E-02 | 1.27E-02 |
| hsa-miR-3613-5p   | TGTTGTACTTTTTTTTTGTTC   | 1.02 | 0.89 | 1.11 | 6.66E-04 | 3.32E-02 | 1.02E-02 |
| hsa-miR-3615-3p   | TCTCTCGGCTCCTCGGGCTC    | 2.73 | 2.20 | 3.15 | 7.07E-13 | 3.31E-04 | 1.23E-10 |
| hsa-miR-362-3p    | AACACACCTATTCAAGGATTCA  | 1.13 | 0.74 | 1.43 | 2.85E-04 | 9.40E-02 | 1.50E-03 |
| hsa-miR-363-3p    | AATTGCACGGTATCCATCTGTA  | 2.07 | 1.30 | 2.68 | 3.48E-07 | 3.60E-02 | 9.24E-07 |
| hsa-miR-365a-3p   | TAATGCCCTAAAAATCCTTAT   | 0.67 | 1.18 | 0.26 | 2.16E-02 | 2.26E-02 | 4.52E-01 |
| hsa-miR-369-3p    | AATAATACATGGTTGATCTTT   | 0.53 | 0.19 | 0.83 | 7.37E-02 | 6.89E-01 | 3.53E-02 |
| hsa-miR-375-3p    | TTTGTTCGTTCCGGCTCGCGTGA | 4.17 | 3.87 | 4.41 | 1.70E-17 | 1.38E-07 | 1.26E-10 |



|                   |                         |      |      |      |          |          |          |
|-------------------|-------------------------|------|------|------|----------|----------|----------|
| hsa-miR-376c-3p   | AACATAGAGGAAATCCACGT    | 0.66 | 0.34 | 0.92 | 3.80E-02 | 5.02E-01 | 3.18E-02 |
| hsa-miR-378a-3p   | ACTGGACTTGGAGTCAGAAGGC  | 2.59 | 2.04 | 3.02 | 2.03E-10 | 1.23E-03 | 2.13E-08 |
| hsa-miR-423-3p    | AGCTCGGTCTGAGGCCCTCAGT  | 1.56 | 1.16 | 1.87 | 2.79E-06 | 2.63E-02 | 2.45E-05 |
| hsa-miR-423-5p    | TGAGGGCAGAGAGCGAGACTTT  | 3.44 | 2.98 | 3.80 | 2.03E-17 | 1.01E-06 | 7.89E-12 |
| hsa-miR-424-5p    | CAGCAGCAATTCATGTTTGAA   | 2.50 | 2.12 | 2.82 | 1.15E-10 | 2.03E-04 | 2.56E-07 |
| hsa-miR-425-3p    | ATCGGGAATGTCGTGCCGCC    | 0.67 | 0.46 | 0.83 | 1.86E-02 | 2.90E-01 | 3.29E-02 |
| hsa-miR-425-5p    | AATGACACGATCACTCCCCTTGA | 2.08 | 1.63 | 2.44 | 2.03E-08 | 3.03E-03 | 2.80E-06 |
| hsa-miR-4286-5p   | ACCCCACTCCTGGTACC       | 0.97 | 0.79 | 1.12 | 5.77E-03 | 1.34E-01 | 1.86E-02 |
| hsa-miR-4508-5p   | GCGGGGCTGGGCGCGCG       | 2.43 | 2.65 | 2.27 | 2.48E-10 | 9.27E-05 | 5.06E-07 |
| hsa-miR-451a-3p   | TAGTAATGGTAATGTTCTCT    | 1.22 | 0.82 | 1.54 | 3.24E-06 | 2.57E-02 | 8.23E-05 |
| hsa-miR-451a-5p   | AAACCGTTACCATTAAGTGT    | 2.19 | 1.61 | 2.65 | 7.26E-09 | 1.04E-03 | 2.82E-06 |
| hsa-miR-4532-5p   | CCCCGGGGAGCCCGCG        | 0.71 | 0.42 | 0.95 | 4.58E-02 | 5.14E-01 | 1.31E-02 |
| hsa-miR-4732-3p   | GCCCTGACCTGCTGTTCTG     | 1.87 | 1.78 | 1.94 | 3.74E-10 | 7.16E-04 | 1.02E-07 |
| hsa-miR-4732-5p   | TGTAGAGCAGGGAGCAGGAAGCT | 1.93 | 1.90 | 1.94 | 8.10E-09 | 3.94E-04 | 1.39E-05 |
| hsa-miR-483-3p    | TCACTCCTCTCCTCCCTCTT    | 1.31 | 1.24 | 1.35 | 1.40E-04 | 2.89E-02 | 2.50E-03 |
| hsa-miR-483-5p    | AAGACGGGAGGAAAGAAGGGAG  | 1.57 | 1.18 | 1.87 | 2.16E-05 | 5.28E-02 | 1.09E-04 |
| hsa-miR-484-5p    | TCAGGCTCAGTCCCCTCCGAT   | 3.05 | 2.68 | 3.35 | 1.11E-15 | 1.03E-05 | 1.81E-11 |
| hsa-miR-486-1-3p  | CGGGGCGACTCAGTACAGGAT   | 1.81 | 1.64 | 1.94 | 1.93E-08 | 1.81E-03 | 1.11E-05 |
| hsa-miR-486-1-5p  | TCCTGTACTGAGTCCCGGAG    | 3.85 | 3.48 | 4.13 | 3.36E-17 | 8.47E-07 | 1.49E-11 |
| hsa-miR-497-5p    | CAGCAGCACTGTGTTTGT      | 1.10 | 1.39 | 0.86 | 6.57E-04 | 8.67E-03 | 3.96E-02 |
| hsa-miR-500a-3p   | ATGCACCTGGGCAAGGATTCTG  | 1.12 | 0.38 | 1.70 | 2.94E-03 | 5.31E-01 | 2.90E-04 |
| hsa-miR-501-3p    | AATGCACCGGGCAAGGATTCT   | 1.50 | 1.22 | 1.72 | 7.66E-07 | 5.48E-03 | 2.33E-04 |
| hsa-miR-502-3p    | AATGCACCTGGGCAAGGATTCA  | 1.78 | 1.36 | 2.10 | 1.09E-05 | 3.92E-03 | 1.29E-03 |
| hsa-miR-505-3p    | CGTCAACACTTGCTGTTTCTCT  | 1.55 | 1.10 | 1.91 | 2.07E-05 | 6.68E-02 | 6.69E-05 |
| hsa-miR-532-3p    | CCTCCACACCCAAGGCTTGCA   | 1.05 | 1.04 | 1.07 | 1.69E-04 | 1.62E-02 | 9.48E-03 |
| hsa-miR-532-5p    | CATGCCTTGAGTGTAGGACCGT  | 1.79 | 1.48 | 2.02 | 5.28E-07 | 9.08E-03 | 1.17E-05 |
| hsa-miR-548q-5p   | GCTGGTGCAAAAGTAATGGCGG  | 1.50 | 1.31 | 1.64 | 1.79E-08 | 4.62E-04 | 2.23E-05 |
| hsa-miR-550a-1-3p | TGCTTACTCCCTCAGGCACAT   | 1.80 | 1.71 | 1.87 | 1.89E-08 | 2.87E-03 | 7.97E-07 |
| hsa-miR-550a-1-5p | AGTGCCTGAGGGAGTAAGAG    | 1.35 | 1.19 | 1.47 | 1.40E-06 | 1.57E-03 | 3.96E-04 |
| hsa-miR-576-5p    | ATTCTAATTTCTCCACGTCTTT  | 0.77 | 0.41 | 1.06 | 7.67E-03 | 3.60E-01 | 6.57E-03 |
| hsa-miR-584-5p    | TTATGGTTTGCCTGGGACTGAG  | 1.41 | 0.92 | 1.79 | 9.24E-05 | 3.34E-02 | 1.49E-03 |
| hsa-miR-590-5p    | GAGCTTATTCATAAAAGTGCGAG | 0.65 | 0.28 | 0.94 | 2.85E-02 | 5.61E-01 | 1.36E-02 |
| hsa-miR-598-3p    | TACGTATCGTTGTCATCGTCA   | 1.10 | 0.64 | 1.46 | 1.03E-04 | 7.45E-02 | 5.45E-04 |
| hsa-miR-6087-5p   | TGAGGCGGGGGGCGGAGC      | 0.73 | 0.60 | 0.85 | 3.13E-02 | 2.65E-01 | 4.90E-02 |
| hsa-miR-628-3p    | TCTAGTAAGAGTGGCAGTCGA   | 0.91 | 0.85 | 0.96 | 2.43E-03 | 1.26E-01 | 4.45E-03 |
| hsa-miR-629-5p    | TGGGTTTACGTTGGGAGAACT   | 1.48 | 1.25 | 1.65 | 1.05E-06 | 2.45E-03 | 2.23E-04 |
| hsa-miR-652-3p    | AATGGCGCCACTAGGGTTGTG   | 1.98 | 1.31 | 2.52 | 2.11E-09 | 6.27E-03 | 2.22E-08 |
| hsa-miR-660-5p    | TACCCATTGCATATCGGAGTTG  | 2.83 | 2.45 | 3.13 | 1.21E-12 | 4.45E-05 | 1.80E-08 |
| hsa-miR-874-3p    | CTGCCCTGGCCGAGGGACCGA   | 1.30 | 1.13 | 1.44 | 3.85E-04 | 5.07E-02 | 4.44E-03 |
| hsa-miR-885-5p    | TCCATTACACTACCCTGCCTCT  | 2.93 | 2.97 | 2.89 | 1.63E-12 | 1.61E-05 | 2.00E-07 |
| hsa-miR-92a-1-3p  | TATTGCACTTGTCGCCCTGT    | 3.66 | 3.51 | 3.77 | 7.06E-18 | 2.79E-07 | 2.78E-11 |
| hsa-miR-92a-2-3p  | TATTGCACTTGTCGCCCTGT    | 1.44 | 1.00 | 1.79 | 2.85E-06 | 3.50E-02 | 2.85E-05 |
| hsa-miR-92b-3p    | TATTGCACTCGTCCCGCCTCC   | 1.30 | 1.66 | 1.02 | 3.16E-05 | 2.22E-03 | 8.90E-03 |
| hsa-miR-93-5p     | CAAAGTGCTGTTCTGTCAGGTAG | 1.81 | 1.13 | 2.34 | 2.87E-06 | 2.98E-02 | 4.67E-05 |
| hsa-miR-96-5p     | TTGGCACTAGCACATTTTGTCT  | 1.65 | 1.75 | 1.57 | 6.39E-06 | 4.50E-04 | 3.83E-03 |
| hsa-miR-99a-5p    | AACCCGTAGATCCGATCTTGTG  | 1.85 | 1.58 | 2.05 | 1.21E-08 | 1.77E-03 | 2.85E-06 |

Table S5. Biological function associated with Moyamoya affected circulating miRNAs.

| Pathway Description                  |                              | Whole plasma                              | EV       | EV-depleted plasma |          |
|--------------------------------------|------------------------------|-------------------------------------------|----------|--------------------|----------|
| Environmental Information Processing | Signal transduction          | ErbB signaling pathway                    | 1.10E-07 | 3.30E-03           | 1.40E-14 |
|                                      |                              | mTOR signaling pathway                    | 7.20E-06 | 6.00E-03           | 1.90E-07 |
|                                      |                              | VEGF signaling pathway                    | 1.50E-05 | 8.90E-02           | 2.00E-06 |
|                                      |                              | MAPK signaling pathway                    | 7.90E-04 | 6.40E-06           | 1.40E-08 |
|                                      |                              | Wnt signaling pathway                     | 8.10E-04 |                    | 2.50E-09 |
|                                      |                              | TGF-beta signaling pathway                | 3.00E-02 | 1.30E-02           | 7.40E-09 |
|                                      |                              | Notch signaling pathway                   |          | 3.90E-03           | 2.60E-02 |
|                                      |                              | Jak-STAT signaling pathway                |          | 2.30E-02           | 2.20E-06 |
|                                      |                              | Hedgehog signaling pathway                |          |                    | 1.50E-02 |
| Cellular Processes                   | Transport and catabolism     | Endocytosis                               |          | 2.30E-02           | 2.40E-03 |
|                                      |                              | Autophagy                                 |          | 4.40E-02           |          |
|                                      | Cell motility                | Regulation of actin cytoskeleton          | 6.60E-02 | 5.30E-02           | 7.50E-05 |
|                                      | Cell growth and death        | Apoptosis                                 | 7.60E-03 | 7.10E-04           | 3.80E-03 |
|                                      |                              | Oocyte meiosis                            | 2.20E-02 |                    |          |
|                                      |                              | Cell cycle                                | 3.90E-02 | 2.20E-02           | 7.00E-08 |
|                                      |                              | p53 signaling pathway                     |          | 1.80E-02           | 6.50E-04 |
|                                      | Cellular community           | Focal adhesion                            | 6.80E-16 | 9.20E-06           | 2.10E-12 |
|                                      |                              | Adherens junction                         | 1.30E-04 | 5.00E-05           | 8.20E-09 |
|                                      |                              | Tight junction                            | 5.10E-02 | 8.20E-02           |          |
| Gap junction                         |                              |                                           |          | 1.40E-02           |          |
| Organismal Systems                   | Immune system                | Toll-like receptor signaling pathway      | 2.90E-05 | 2.60E-02           | 2.40E-04 |
|                                      |                              | Fc epsilon RI signaling pathway           | 1.50E-04 | 9.90E-02           | 1.80E-05 |
|                                      |                              | T cell receptor signaling pathway         | 2.80E-04 | 2.90E-03           | 5.80E-06 |
|                                      |                              | B cell receptor signaling pathway         | 6.90E-04 | 2.70E-02           | 3.00E-07 |
|                                      |                              | Leukocyte transendothelial migration      | 3.00E-02 | 5.00E-02           | 1.00E-03 |
|                                      |                              | Fc gamma R-mediated phagocytosis          | 4.10E-02 |                    | 2.00E-03 |
|                                      |                              | Chemokine signaling pathway               | 8.00E-02 | 9.30E-03           | 6.60E-07 |
|                                      |                              | Natural killer cell mediated cytotoxicity |          |                    | 8.00E-03 |
|                                      | Endocrine system             | Adipocytokine signaling pathway           | 6.00E-06 | 1.10E-04           | 2.10E-05 |
|                                      |                              | Progesterone-mediated oocyte maturation   | 4.70E-05 | 6.50E-04           | 2.30E-04 |
|                                      |                              | Insulin signaling pathway                 | 3.30E-04 | 8.80E-06           | 1.20E-06 |
|                                      |                              | GnRH signaling pathway                    | 3.30E-03 |                    | 7.10E-04 |
|                                      |                              | Melanogenesis                             | 1.40E-02 |                    | 2.00E-04 |
|                                      | Nervous system               | Aldosterone-regulated sodium reabsorption | 8.70E-03 |                    | 5.50E-04 |
|                                      |                              | Neurotrophin signaling pathway            | 8.50E-07 | 3.40E-06           | 5.80E-12 |
|                                      |                              | Long-term depression                      | 1.20E-02 |                    | 3.70E-02 |
|                                      |                              | Long-term potentiation                    | 4.70E-02 |                    | 1.10E-02 |
| Development                          | Dorso-ventral axis formation | 1.30E-02                                  | 2.20E-03 | 1.10E-02           |          |
|                                      | Axon guidance                |                                           |          | 6.70E-04           |          |

Table S6. Biological function associated with RNF213 mutation affected circulating miRNAs.

| Pathway Description                  |                                     | Whole plasma                           | EV       | EV-depleted plasma |
|--------------------------------------|-------------------------------------|----------------------------------------|----------|--------------------|
| Environmental Information Processing | Signal transduction                 | ErbB signaling pathway                 | 5.30E-07 | 9.50E-08           |
|                                      |                                     | Jak-STAT signaling pathway             |          | 1.10E-02           |
|                                      |                                     | MAPK signaling pathway                 | 3.40E-05 | 2.10E-07           |
|                                      |                                     | mTOR signaling pathway                 | 4.90E-04 | 2.00E-04           |
|                                      |                                     | Notch signaling pathway                | 3.90E-02 |                    |
|                                      |                                     | TGF-beta signaling pathway             | 3.60E-06 | 9.90E-04           |
|                                      |                                     | VEGF signaling pathway                 | 1.90E-04 | 1.90E-03           |
|                                      |                                     | Wnt signaling pathway                  | 8.30E-03 | 6.70E-02           |
|                                      | Signaling molecules and interaction | Cytokine-cytokine receptor interaction | 2.70E-02 | 9.30E-02           |
|                                      |                                     | ECM-receptor interaction               | 8.10E-02 |                    |

Figure S1. Venn diagram on number of the detectable miRNA.

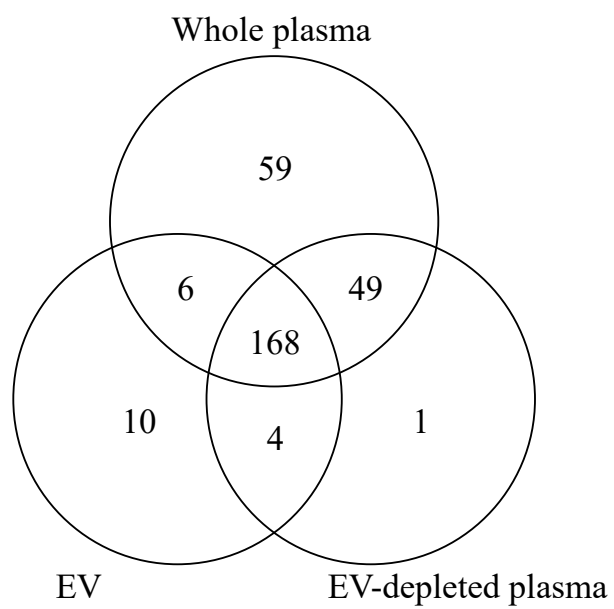

Figure S2. Correlation of all samples.

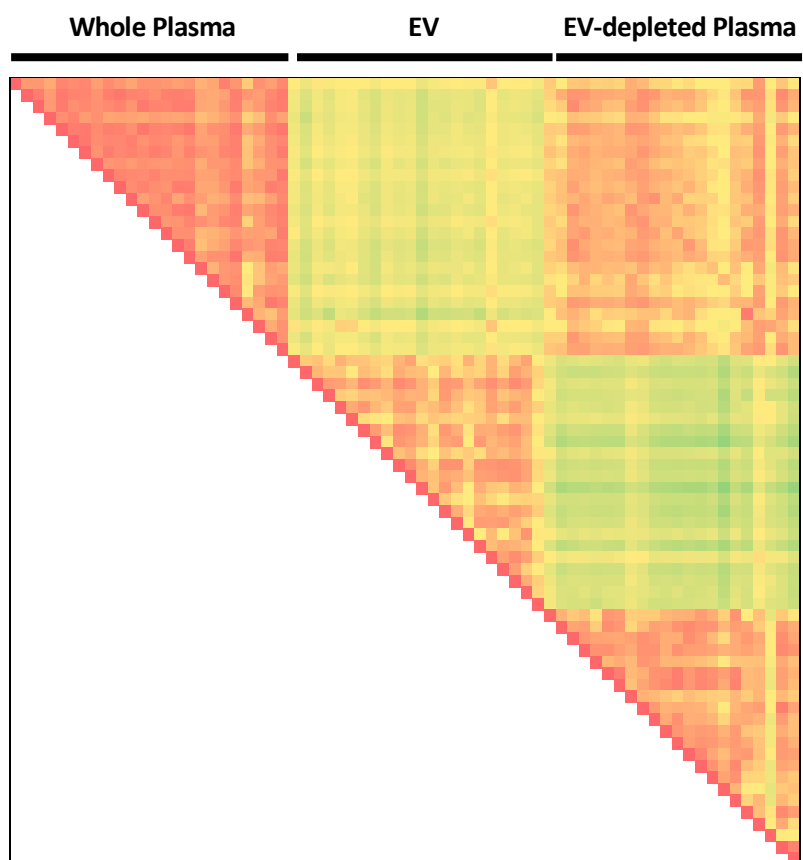

Figure S3. The sequence composition differences between miRNAs enriched inside (black bars) and outside (gray bars) of EVs. The brackets on top of the figure indicate significant difference. X-axis represents the 4 different nucleotides and its fractions among miRNAs enriched either inside or outside of EV are indicated in Y-axis.

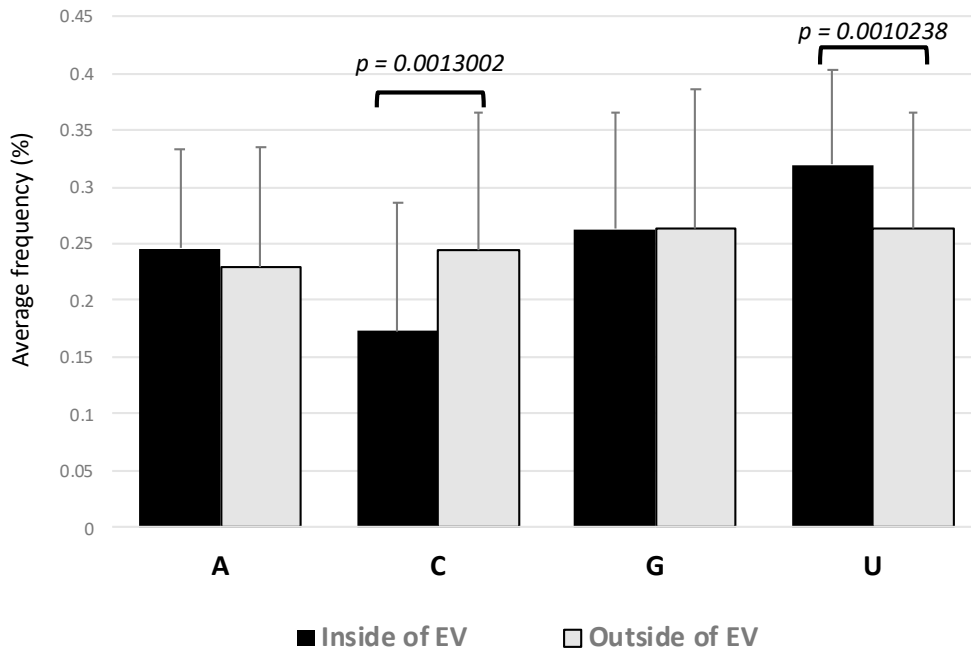

Supplement: jcm-08-01648-s001.pdf [file jcm-08-01648-s001.pdf]
